# Supplementary material
Source: HighWire-hosted journal article supplement (https://bmjopen.bmj.com/content/12/9/e061789)
Supplement: inline-supplementary-material-1 [file inline-supplementary-material-1.pdf]

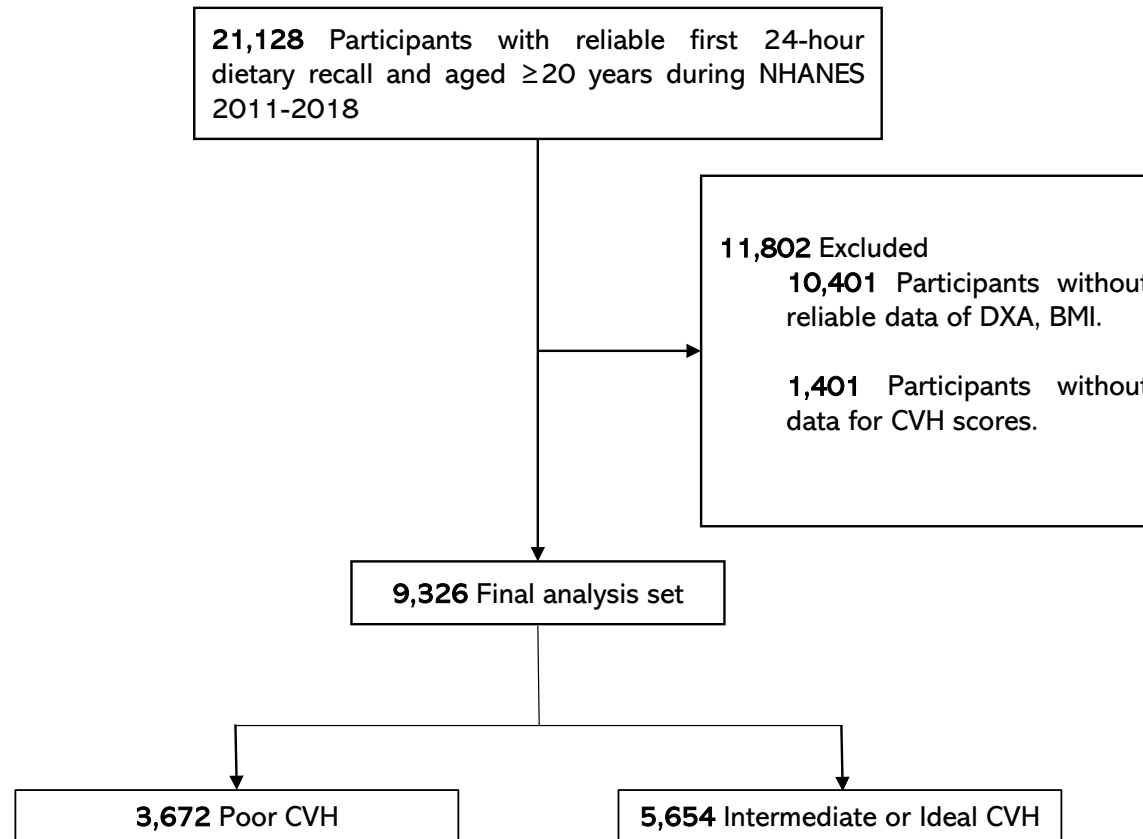

Figure S1. Flowchart.

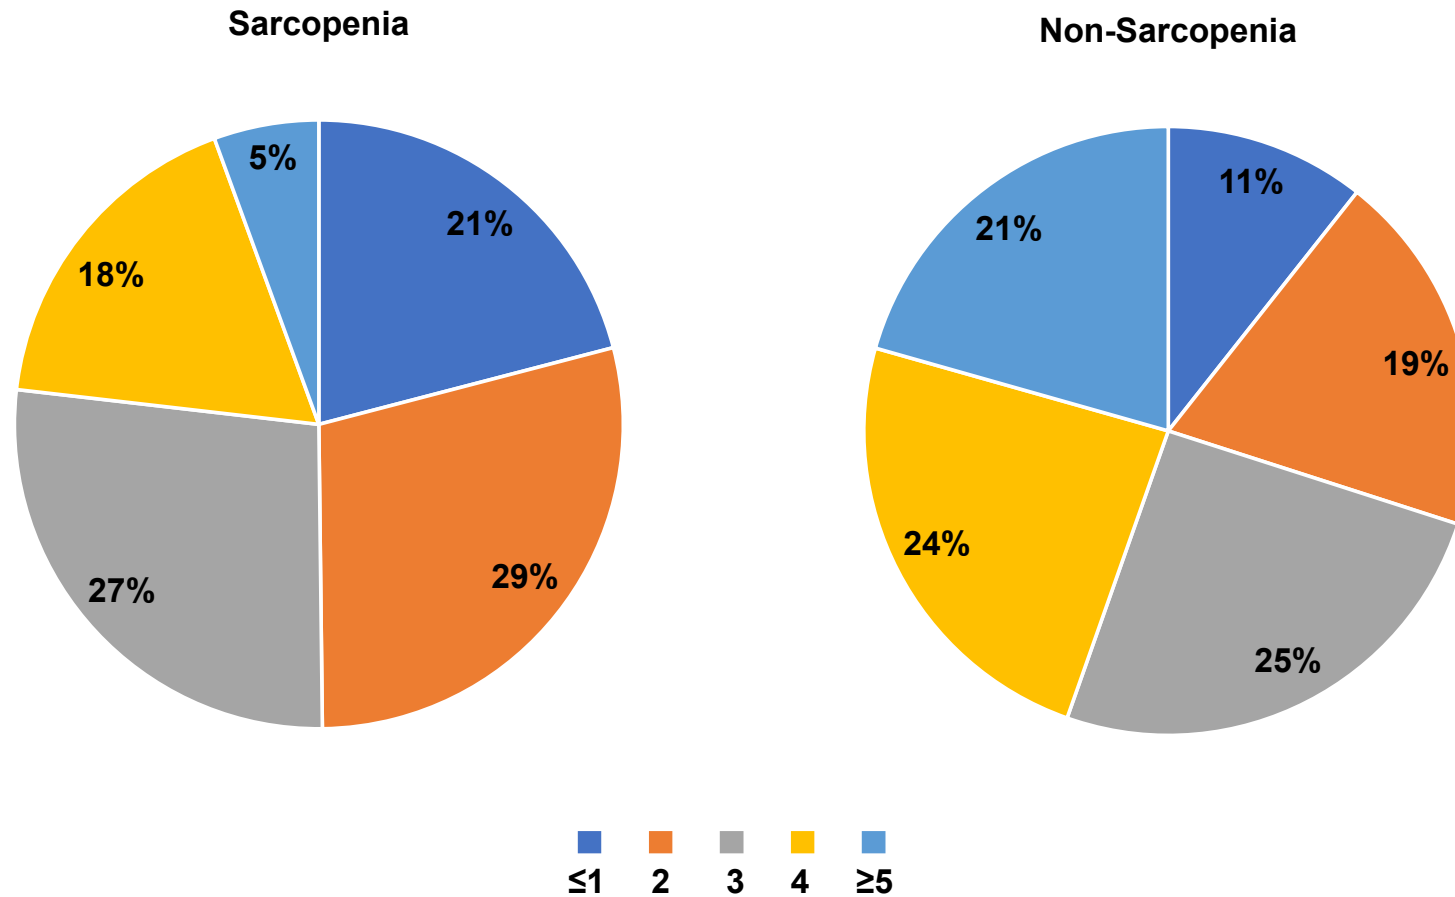

Figure S2. Proportion of ICHVMs in sarcopenia and non-sarcopenia.
